# Supplementary material for: The synergistic effect of defect passivation and energy level adjustment for low-temperature carbon-based CsPbI2Br perovskite solar cells
Source: Royal Society of Chemistry journal article supplement (doi:10.1039/d2tc02762c), 2022-01-01
Supplement: d2tc02762c1.pdf [file d2tc02762c1.pdf]

# Supporting Information

## **Synergistic effect of defect passivation and energy level adjustment for low-temperature carbon-based CsPbI<sub>2</sub>Br perovskite solar cells**

*Xiang Zhang<sup>a</sup>, Dan Zhang<sup>a</sup>, Tonghui Guo<sup>b</sup>, Chunqiu Zheng<sup>c</sup>, Yuan Zhou<sup>a</sup>, Junjun Jin<sup>a</sup>,*

*Zhenkun Zhu<sup>a</sup>, Zhen Wang<sup>a</sup>, Xiaxia Cui<sup>a</sup>, Sujuan Wu<sup>c</sup>, Jing Zhang<sup>b</sup>, Qidong Tai<sup>a\*</sup>*

<sup>a</sup> The Institute of Technological Sciences, Wuhan University, Wuhan 430072, P. R. China.

<sup>b</sup> Department of Microelectronic Science and Engineering, Ningbo University, Zhejiang 315211, P. R. China.

<sup>c</sup> Institute for Advanced Materials, South China Academy of Advanced Optoelectronics, South China Normal University, Guangzhou 510006, P. R. China.

\*Corresponding Authors: [qdtai@whu.edu.cn](mailto:qdtai@whu.edu.cn)

## Experimental Section

### *Material*

Indium-doped tin oxide (ITO, sheet resistance:  $7-9 \Omega \text{ sq}^{-1}$ ) glass, lead (II) bromide ( $\text{PbBr}_2$ , 99.999%), phenylethylammonium iodide (PEAI, 99.9%), phenylethylammonium bromide (PEABr, 99.9%) and cesium iodide (CsI, 99.999%) were bought from Advanced Election Technology Co., Ltd. Tin (IV) oxide ( $\text{SnO}_2$ ) colloid precursor (15 wt% in  $\text{H}_2\text{O}$  colloidal dispersion) was obtained from Alfa Aesar. Lead(II) iodide ( $\text{PbI}_2$ , 99.99%), 4-fluorophenylethylammonium iodide (P-F-PEAI), 4-fluorophenylethylammonium bromide (P-F-PEABr) and poly (3,4-ethylenedioxythiophene):poly (styrenesulfonate) (PEDOT:PSS) were purchased from Xi'an Polymer Light Technology Corp. Lead(II) acetate trihydrate ( $\text{Pb}(\text{Ac})_2$ , 99.999%), N,N-Dimethylformamide (DMF, 99.8%), Dimethyl sulfoxide (DMSO,  $\geq 99.9\%$ ) and ethyl acetate (EA, 99.8%) were provided by Sigma-Aldrich. Isopropyl alcohol (IPA,  $\geq 99.9\%$ ), zinc acetate dihydrate ( $\text{Zn}(\text{Ac})_2 \cdot 2\text{H}_2\text{O}$ , 99.995%), ethanolamine (standard for GC,  $>99.5\%$ ), and 2-Methoxyethanol (anhydrous, 99.8%) were obtained from Aladdin. Conductive carbon pastes were bought from Jujo Printing Supplies & Technology (Pinghu) Co., Ltd. Absolute ethanol and acetone were gotten from Sinopharm.  $\text{PbI}_2(\text{DMSO})$  and  $\text{PbBr}_2(\text{DMSO})$  adducts were synthesized according to the previous works.<sup>1,2</sup>

### *Device fabrication*

Etched ITO glass substrate ( $1.5 \text{ cm} \times 1.5 \text{ cm}$ ) was sequentially cleaned with detergent, deionized water, acetone, IPA, and absolute ethanol under sonication for 20

min, respectively. Later, it was dried by the nitrogen ( $N_2$ ) flow and was treated with ultraviolet (UV)-ozone for 5 min. The  $SnO_2$  ETL was deposited on the ITO glass substrate by spin-coating diluted  $SnO_2$  solution (2.67 wt% in deionized water) at 500 rpm for 3 s and 4000 rpm for 30 s, followed by annealing at 150 °C for 30 min in ambient air. It was treated with UV-ozone for 10 min, the pre-prepared ZnO solution (250 mg  $Zn(Ac)_2 \cdot 2H_2O$  was dissolved in 10 ml 2-Methoxyethanol and 275  $\mu$ l ethanolamine and stirred for 12 h) was spin-coated on the  $SnO_2$  ETL at 500 rpm for 3 s and 4000 rpm for 60 s and annealed at 150 °C for 30 min in ambient air. After naturally cooling down, the glass/ITO/ $SnO_2$ /ZnO substrate was moved into a  $N_2$ -filled glovebox for perovskite and carbon electrode deposition. To obtain the  $CsPbI_2Br$  precursor solution, 234 mg CsI, 243 mg  $PbI_2(DMSO)$ , 200 mg  $PbBr_2(DMSO)$  and 5 mg  $Pb(Ac)_2$  were added in 1 mL mixed solvents of DMSO and DMF (1:4, v/v) and stirred at 70 °C for 12 h. The prepared precursor solution was filtered with PTFE filter (0.22  $\mu$ m), and then was spin-coated onto the glass/ITO/ $SnO_2$ /ZnO substrate at 1000 rpm for 10 s and 4000 rpm for 40 s. In the last 20 s of second step, 150  $\mu$ L anti-solvent EA was quickly dropped onto the precursor film. The obtained precursor film was annealed at 120 °C for 10 min. For the passivation layers, the IPA precursor solution with various concentrations of PEAI, PEABr, P-F-PEAI or P-F-PEABr was dropped onto the  $CsPbI_2Br$  surface and allowed to stand for 2 min before spin-coating. After that, they were spin-coated on the  $CsPbI_2Br$  films at 3000 rpm for 30 s and baked at 100 °C for 15 min. Finally, conductive carbon paste was deposited on the sample surface by the

doctor-blade technique and annealed at 120 °C for 20 min to evaporate the residual solvents. The device active area is 0.09 cm<sup>2</sup>.

### *Characterization*

The current density-voltage ( $J$ - $V$ ) characteristics were recorded by an Oriel Sol 3A solar simulator (Newport, USA) with a Keithley 2400 source meter under a simulated AM 1.5G solar illumination. The light intensity ( $P_{light}$ ) was calibrated to be 100 mW cm<sup>-2</sup> by a National Renewable Energy Laboratory (NREL)-certified standard silicon solar cell. The reverse voltage scan rate (from 1.5 to 0 V) was 100 m V s<sup>-1</sup> with a delay time of 50 ms. The external quantum efficiency (EQE) spectra were collected with a standard EQE system (Newport 66902, USA). The crystal structure was obtained by an X-ray diffractometer (XRD, Bruker D8 Advance, Germany) with Cu  $K\alpha$  ( $\lambda = 1.5406 \text{ \AA}$ ) radiation source at 40 kV and 40 mA. The chemical binding energy was monitored by an X-ray photoelectron spectrometer (XPS, Thermo Scientific K-Alpha+, USA) with an Al  $K\alpha$  ( $h\nu = 1486.6 \text{ eV}$ ) radiation source. Fourier-transform infrared spectroscopy (FTIR) spectra were collected using a Nicolet iS5 instrument (Thermo Scientific, USA) with an iD7 ATR-diamond. The morphologies and energy-dispersive X-ray (EDX) elemental mapping were tested using a field-emission scanning electron microscopy (SEM, Zeiss SIGMA, Germany). The root mean square (RMS) roughness was investigated by the Nano Wizard 4 atomic force microscopy (AFM, JPK Inc. Germany). The UV-visible (UV-vis) absorption spectra were recorded on the UV-vis near-infrared spectrophotometer (Shimadzu UV-2600i, Japan). Steady-state photoluminescence (PL) and time-resolved PL (TRPL) decay spectra were performed

with a fluorescence spectrometer (HORIBA DeltaFlex, U.K.) with excitation wavelength of 485 nm. The ultraviolet photoelectron spectroscopy (UPS) was measured using an ESCALAB Xi+ system (Thermo Fisher, USA). The electrochemical impedance spectroscopy (EIS), transient photovoltage (TPV), transient photocurrent (TPC), and capacitance-voltage ( $C^2-V$ ) measurements were conducted on an electrochemical workstation (Zahner, Germany). The dark  $J-V$  curves were detected by a Keithley 2400 source meter with a scan rate of  $100 \text{ mV s}^{-1}$ . The contact angles were measured using an optical goniometer (Dataphysics OCA 20, Germany) by drop casting a single drop (0.01 mL) of  $\text{H}_2\text{O}$  on the perovskite film and analyzed with its software. The photograph was taken after the  $\text{H}_2\text{O}$  droplet was in contact with the perovskite film for 1 s. Unless otherwise specified, all measurements were carried out in ambient air ( $25 \text{ }^\circ\text{C}$ , 20-30% relative humidity (RH)).

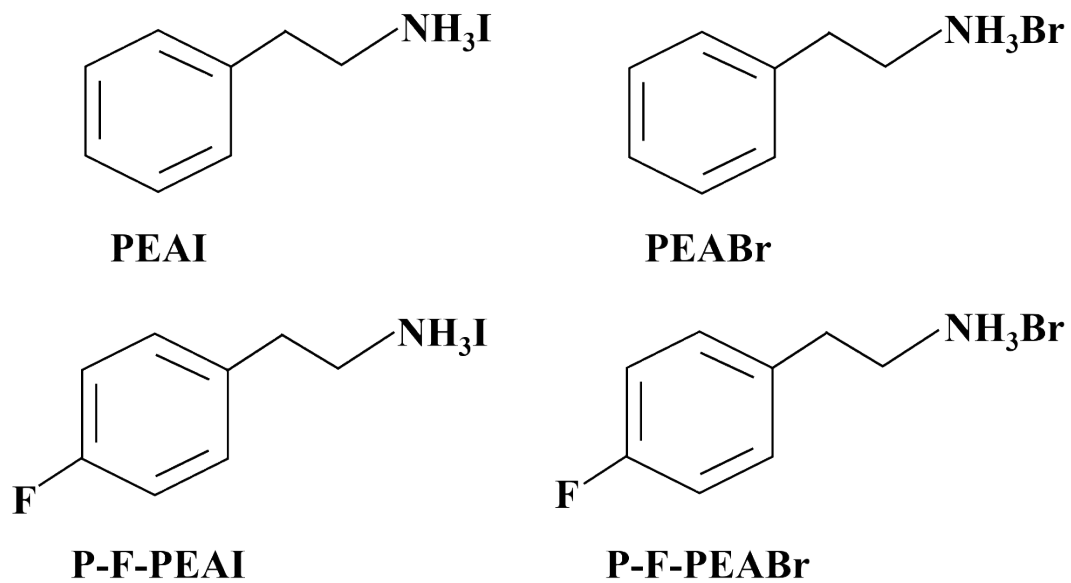

**Fig. S1** Molecular structures of PEAI, PEABr, P-F-PEAI and P-F-PEABr.

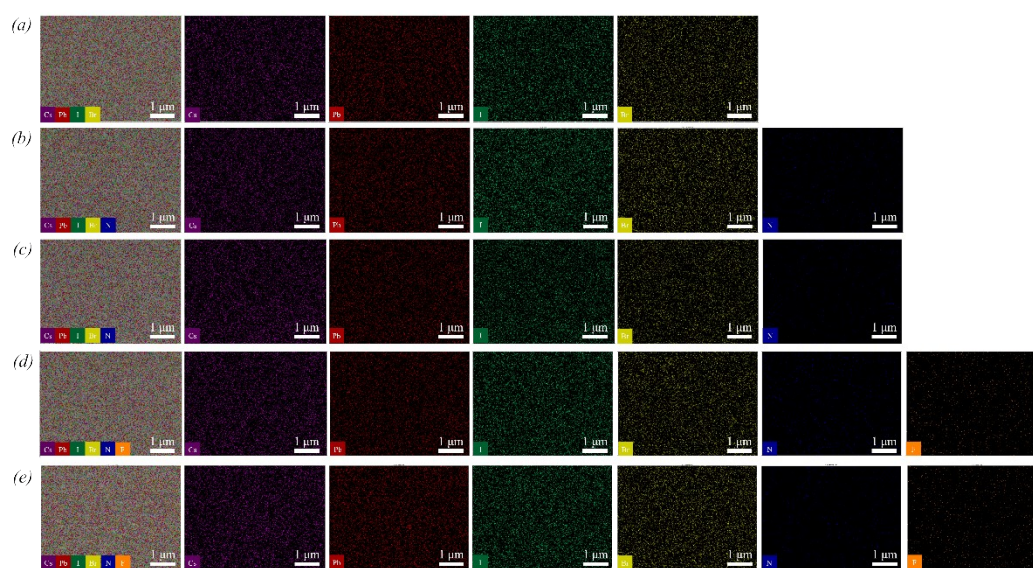

**Fig. S2** EDX elemental mapping of reference and passivated CsPbI<sub>2</sub>Br films: (a) reference, (b) PEAI, (c) PEABr, (d) P-F-PEAI and (e) P-F-PEABr.

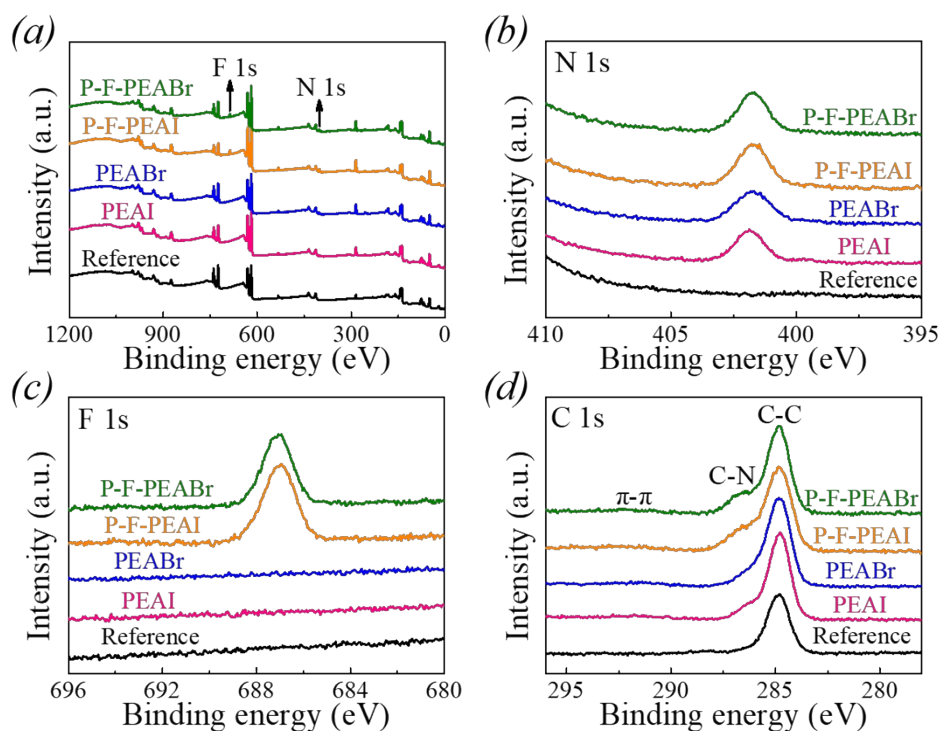

**Fig. S3** (a) Full XPS survey spectra, (b) N 1s, (c) F 1s and (d) C 1s XPS spectra of reference and passivated CsPbI<sub>2</sub>Br films.

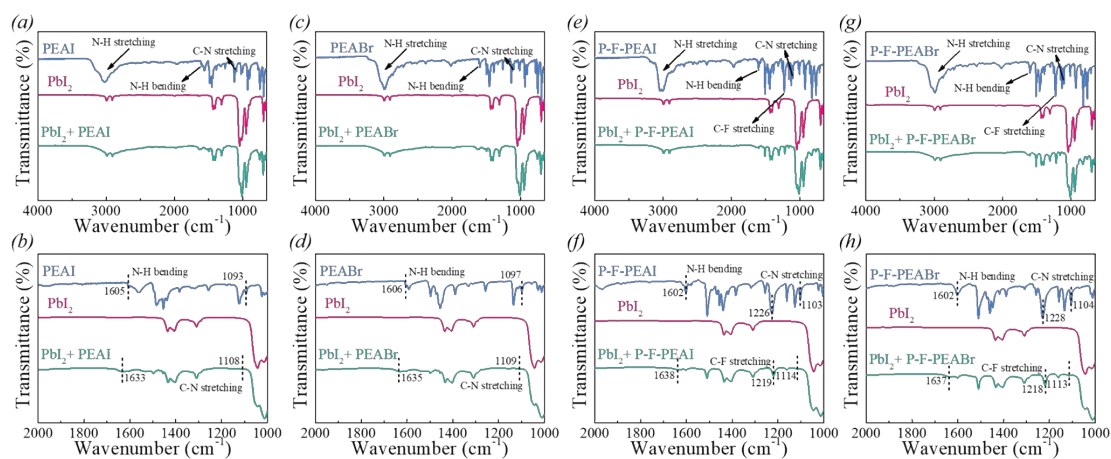

**Fig. S4** FTIR spectra of organic ammonium halide salts **powders**, PbI<sub>2</sub> **powders**, and organic ammonium halide salts/PbI<sub>2</sub> mixed **powders**. Mixed powders were obtained by dissolving them in 1 ml DMSO at 70 °C under stirring for 12 h, followed by the removal of DMSO solvent by rotary evaporation and drying in a vacuum oven at 60 °C for 48 h. The molar mass of PbI<sub>2</sub> is 0.9 M. The mass ratio of organic ammonium halide salts/PbI<sub>2</sub> is 1:5.

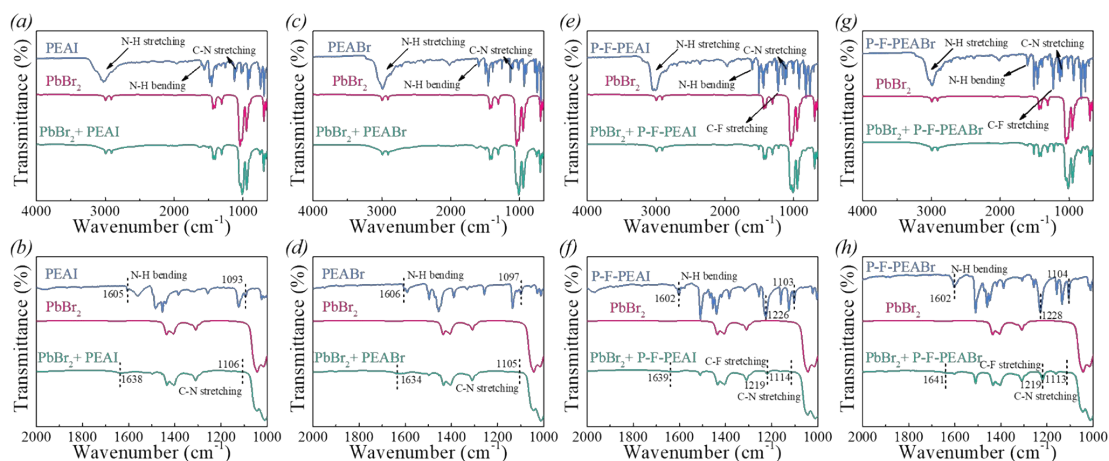

**Fig. S5** FTIR spectra of organic ammonium halide salts **powders**,  $\text{PbBr}_2$  **powders**, and organic ammonium halide salts/ $\text{PbBr}_2$  mixed **powders**. Mixed powders were obtained by dissolving them in 1ml DMSO at 70 °C under stirring for 12 h, followed by the removal of DMSO solvent by rotary evaporation and drying in a vacuum oven at 60 °C for 48 h. The molar mass of  $\text{PbBr}_2$  is 0.9 M. The mass ratio of organic ammonium halide salts/ $\text{PbBr}_2$  is 1:5.

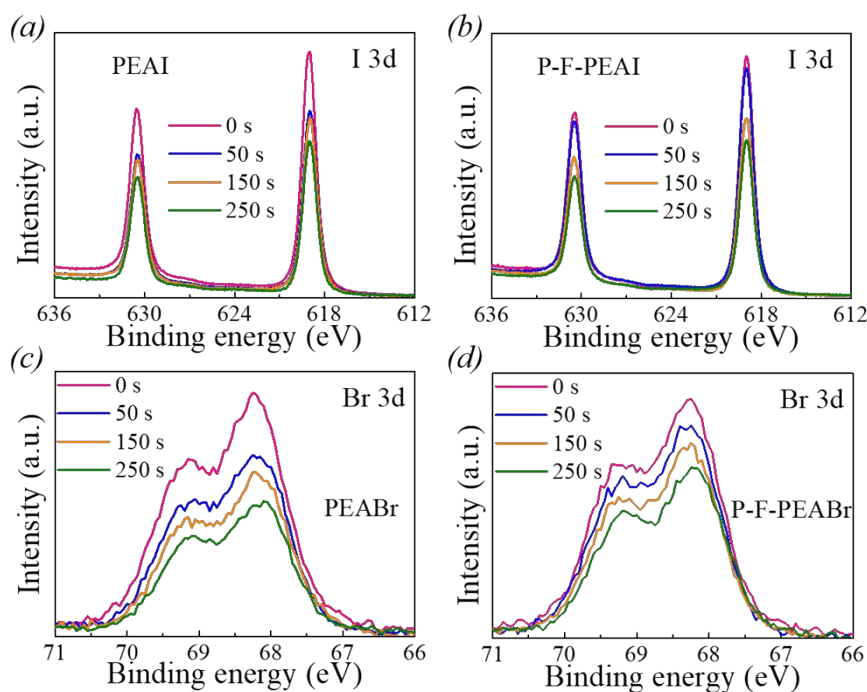

**Fig. S6** XPS depth spectra of I 3d and Br 3d in the passivated  $\text{CsPbI}_2\text{Br}$  films: (a) PEAI, (b) P-F-PEAI, (c) PEABr, (d) P-F-PEABr.



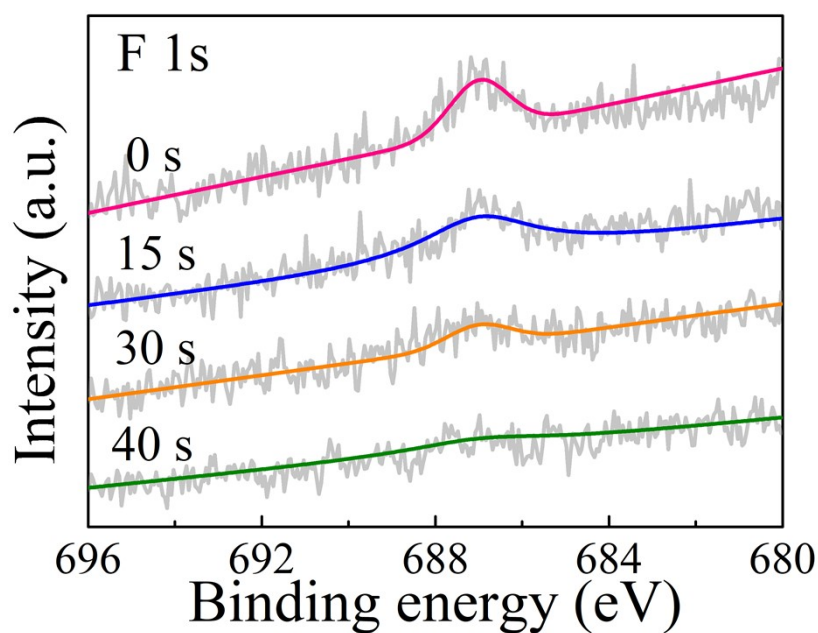

**Fig. S7** XPS depth spectra of F 1s in the P-F-PEABr passivated CsPbI<sub>2</sub>Br films.

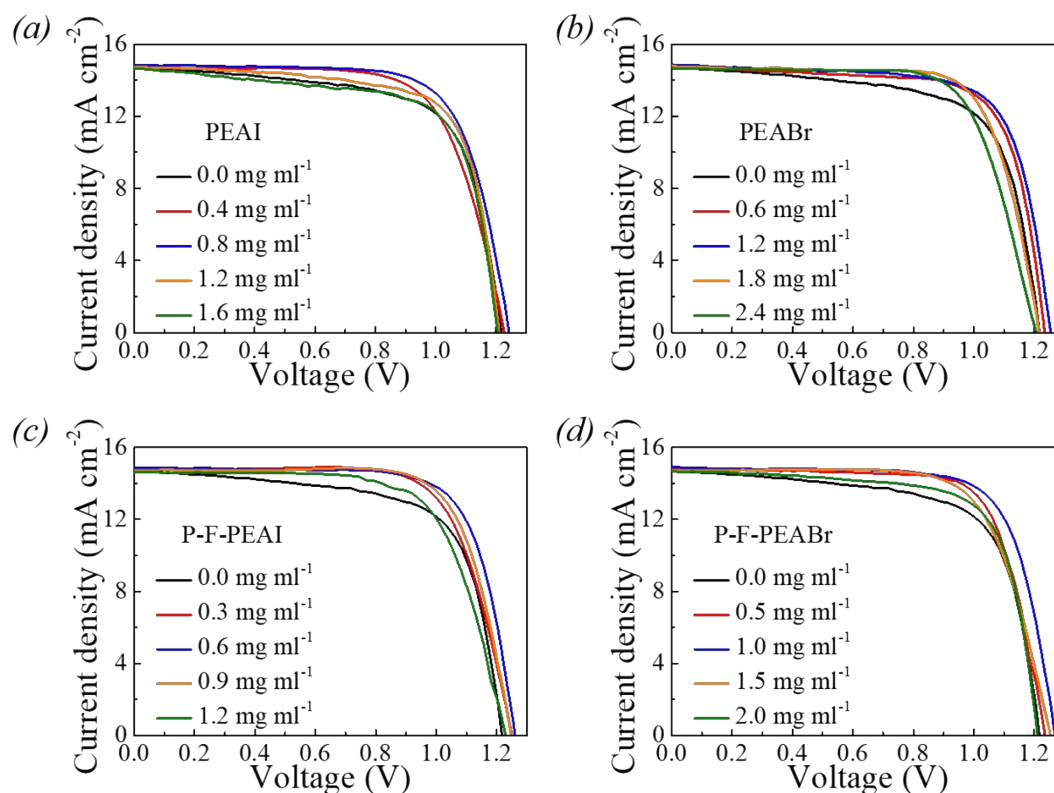

**Fig. S8**  $J$ - $V$  curves for CsPbI<sub>2</sub>Br C-IPSCs passivated by the organic ammonium halide salts with different precursor solution concentrations: (a) PEAI, (b) PEABr, (c) P-F-PEAI and (d) P-F-PEABr.

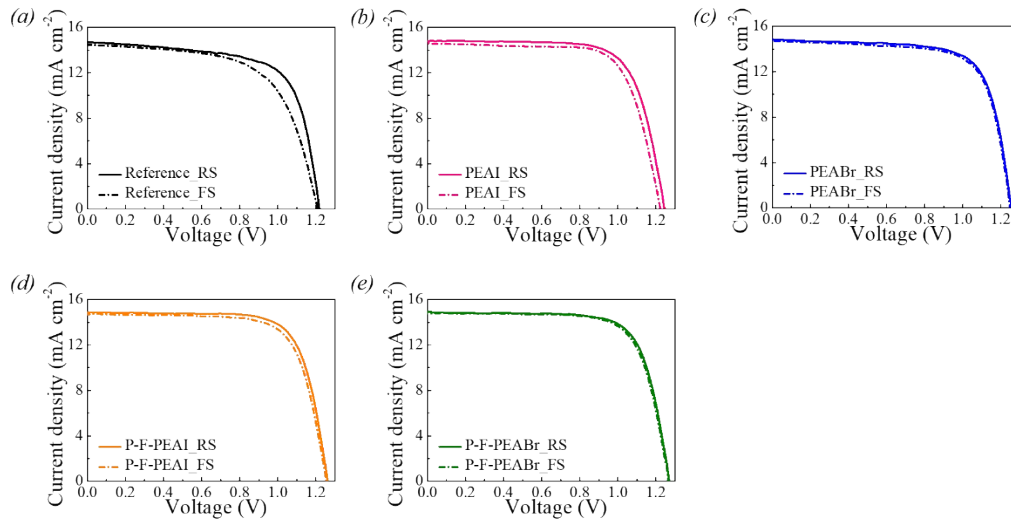

**Fig. S9**  $J$ - $V$  curves for various carbon-based  $\text{CsPbI}_2\text{Br}$  PSCs under both the reverse scan ( $RS$ ) and forward scan ( $FS$ ) directions: (a) reference, (b) PEAI, (c) PEABr, (d) P-F-PEAI and (e) P-F-PEABr.

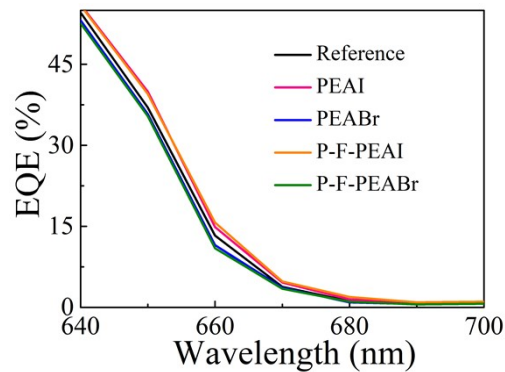

**Fig. S10** Enlarged view of EQE curves at long wavelengths.

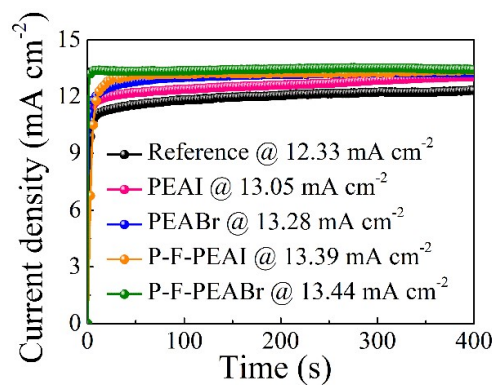

**Fig. S11** SPO curves of  $J_{sc}$  for reference and passivated devices at their maximum power points.

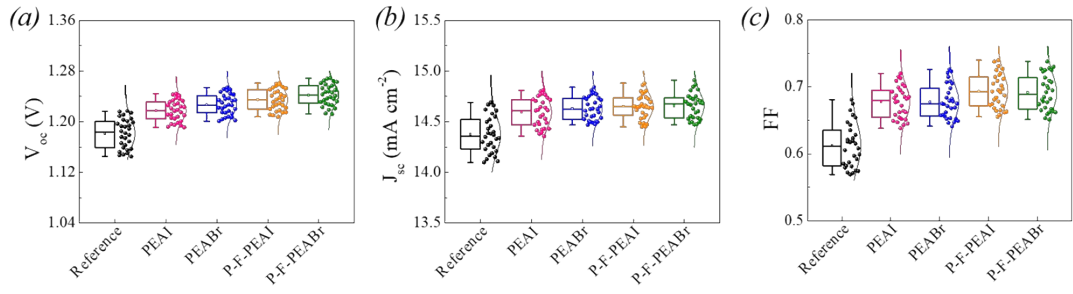

**Fig. S12** (a)  $V_{oc}$ , (b)  $J_{sc}$  and (c) FF distributions of reference and passivated devices from 30 individual C-IPSCs.

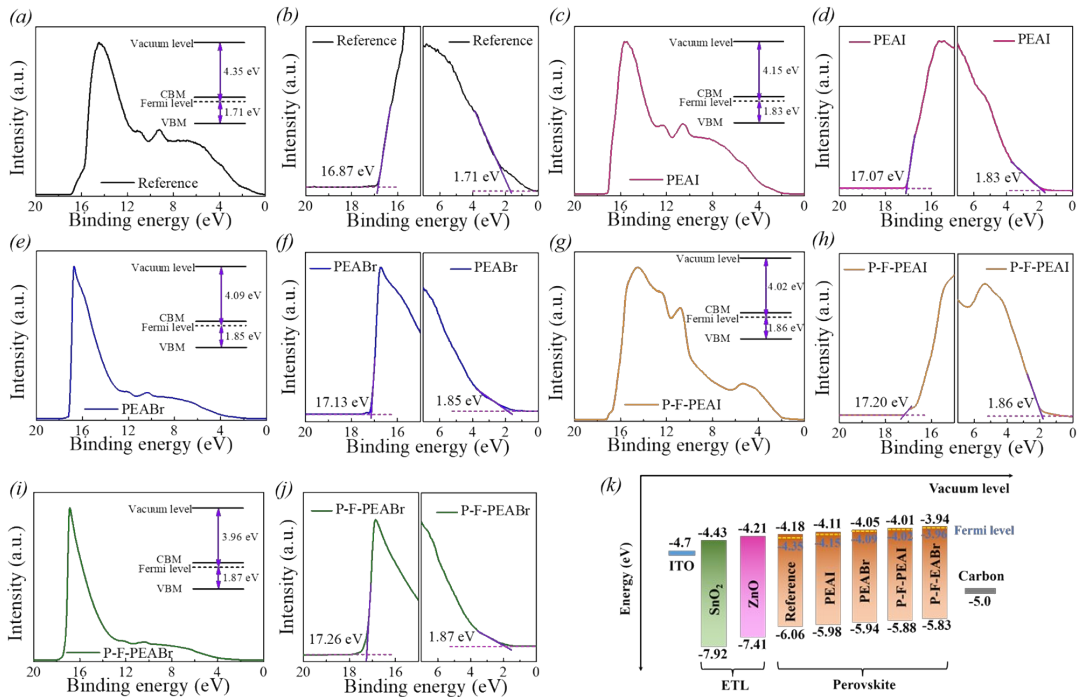

**Fig. S13** UPS spectra of secondary electron cut-off ( $E_{cut-off}$ ) and onset ( $E_{onset}$ ) energy of reference and passivated  $\text{CsPbI}_2\text{Br}$  films: (a-b) reference, (c-d) PEAI, (e-f) PEABr, (g-h) P-F-PEAI and (i-j) P-F-PEABr. (k) Energy level diagram of corresponding materials used in the  $\text{CsPbI}_2\text{Br}$  C-IPSCs.

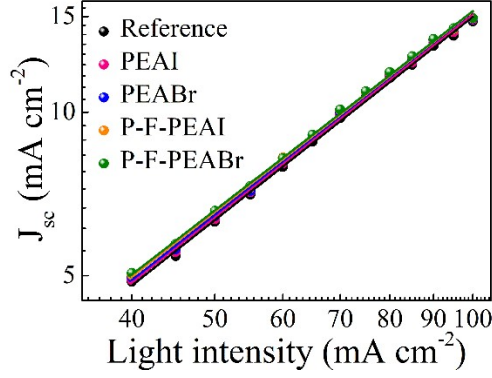

**Fig. S14**  $J_{sc}$  versus  $P_{light}$  for reference and passivated devices.

**Table S1.** Fitting parameters of TRPL decay spectra of reference and passivated CsPbI<sub>2</sub>Br films on the glass substrate.

| Sample    | $A_1$ | $\tau_1$<br>(ns) | $\tau_1$<br>(%) | $A_2$ | $\tau_2$<br>(ns) | $\tau_2$<br>(%) | $\tau_{pl}$<br>(ns) |
|-----------|-------|------------------|-----------------|-------|------------------|-----------------|---------------------|
| Reference | 0.58  | 8.58             | 19.47           | 0.74  | 27.81            | 80.53           | 24.07               |
| PEAI      | 0.56  | 33.37            | 69.75           | 0.78  | 10.39            | 30.25           | 26.42               |
| PEABr     | 0.47  | 11.31            | 14.26           | 0.73  | 43.78            | 85.74           | 39.15               |
| P-F-PEAI  | 0.38  | 13.17            | 8.21            | 0.76  | 73.60            | 91.79           | 68.64               |
| P-F-PEABr | 0.32  | 11.45            | 5.41            | 0.81  | 79.05            | 94.59           | 75.39               |

**Table S2.** The  $V_{TFL}$  and  $N_{trap}$  values of hole-only devices with the architecture of ITO/PEDOT:PSS/CsPbI<sub>2</sub>Br/with or without the passivation layers/carbon.

| Device                                    | Reference | PEAI | PEABr | P-F-PEAI | P-F-PEABr |
|-------------------------------------------|-----------|------|-------|----------|-----------|
| $V_{TFL}$ (V)                             | 1.82      | 1.65 | 1.34  | 1.25     | 1.19      |
| $N_{trap}$ ( $10^{16}$ cm <sup>-3</sup> ) | 1.50      | 1.36 | 1.10  | 1.03     | 0.98      |

**Table S3.** Photovoltaic parameters of CsPbI<sub>2</sub>Br C-IPSCs passivated by the PEAI with different precursor solution concentrations.

| Concentration (mg ml <sup>-1</sup> ) | $V_{oc}$ (V) | $J_{sc}$ (mA cm <sup>-2</sup> ) | FF    | PCE (%) |
|--------------------------------------|--------------|---------------------------------|-------|---------|
| 0.0                                  | 1.217        | 14.69                           | 0.681 | 12.18   |
| 0.4                                  | 1.227        | 14.73                           | 0.696 | 12.58   |
| 0.8                                  | 1.244        | 14.81                           | 0.720 | 13.27   |
| 1.2                                  | 1.212        | 14.76                           | 0.716 | 12.81   |
| 1.6                                  | 1.205        | 14.64                           | 0.695 | 12.26   |

**Table S4.** Photovoltaic parameters of CsPbI<sub>2</sub>Br C-IPSCs passivated by the PEABr with different precursor solution concentrations.

| Concentration (mg ml <sup>-1</sup> ) | $V_{oc}$ (V) | $J_{sc}$ (mA cm <sup>-2</sup> ) | FF    | PCE (%) |
|--------------------------------------|--------------|---------------------------------|-------|---------|
| 0.0                                  | 1.217        | 14.69                           | 0.681 | 12.18   |
| 0.6                                  | 1.234        | 14.70                           | 0.730 | 13.24   |
| 1.2                                  | 1.254        | 14.84                           | 0.726 | 13.51   |
| 1.8                                  | 1.216        | 14.75                           | 0.733 | 13.15   |
| 2.4                                  | 1.204        | 14.66                           | 0.711 | 12.55   |

**Table S5.** Photovoltaic parameters of CsPbI<sub>2</sub>Br C-IPSCs passivated by the P-F-PEAI with different precursor solution concentrations.

| Concentration (mg ml <sup>-1</sup> ) | $V_{oc}$ (V) | $J_{sc}$ (mA cm <sup>-2</sup> ) | FF    | PCE (%) |
|--------------------------------------|--------------|---------------------------------|-------|---------|
| 0.0                                  | 1.217        | 14.69                           | 0.681 | 12.18   |
| 0.3                                  | 1.250        | 14.77                           | 0.718 | 13.26   |
| 0.6                                  | 1.261        | 14.88                           | 0.740 | 13.89   |
| 0.9                                  | 1.249        | 14.73                           | 0.738 | 13.58   |
| 1.2                                  | 1.229        | 14.64                           | 0.690 | 12.42   |

**Table S6.** Photovoltaic parameters of CsPbI<sub>2</sub>Br C-IPSCs passivated by the P-F-PEABr with different precursor solution concentrations.

| Concentration (mg ml <sup>-1</sup> ) | $V_{oc}$ (V) | $J_{sc}$ (mA cm <sup>-2</sup> ) | FF    | PCE (%) |
|--------------------------------------|--------------|---------------------------------|-------|---------|
| 0.0                                  | 1.217        | 14.69                           | 0.681 | 12.18   |
| 0.5                                  | 1.235        | 14.80                           | 0.739 | 13.51   |
| 1.0                                  | 1.269        | 14.91                           | 0.738 | 13.97   |
| 1.5                                  | 1.253        | 14.72                           | 0.710 | 13.10   |
| 2.0                                  | 1.211        | 14.65                           | 0.718 | 12.74   |

**Table S7.** Performance comparisons of CsPbI<sub>2</sub>Br C-IPSCs reported to date.

| No. | Device structure                                                                                                                                         | CsPbI <sub>2</sub> Br      |              |                                 |        |       | PCE (%)   | Ref. |
|-----|----------------------------------------------------------------------------------------------------------------------------------------------------------|----------------------------|--------------|---------------------------------|--------|-------|-----------|------|
|     |                                                                                                                                                          | annealing temperature (°C) | $V_{oc}$ (V) | $J_{sc}$ (mA cm <sup>-2</sup> ) | FF     |       |           |      |
| 1   | ITO/SnO <sub>2</sub> /ZnO/CsPbI <sub>2</sub> Br/P-F-PEABr/carbon                                                                                         | 120                        | 1.269        | 14.91                           | 0.738  | 13.97 | This work |      |
| 2   | FTO/c-TiO <sub>2</sub> /CsPbI <sub>2</sub> Br/carbon                                                                                                     | 340                        | 1.15         | 13.54                           | 0.642  | 10.0  | 3         |      |
| 3   | ITO/SnO <sub>2</sub> /Nb-CsPbI <sub>2</sub> Br/carbon                                                                                                    | 160                        | 1.20         | 12.06                           | 0.72   | 10.42 | 4         |      |
| 4   | FTO/Nb <sub>2</sub> O <sub>5</sub> /Cs <sub>0.99</sub> Rb <sub>0.01</sub> PbI <sub>2</sub> Br/carbon                                                     | 350                        | 1.24         | 14.02                           | 0.69   | 12    | 5         |      |
| 5   | FTO/c-TiO <sub>2</sub> /m-TiO <sub>2</sub> /CsPbI <sub>2</sub> Br/P3HT-MWCNT/carbon                                                                      | 280                        | 1.21         | 13.35                           | 0.62   | 10.01 | 6         |      |
| 6   | ITO/SnO <sub>2</sub> /CsPbI <sub>2</sub> Br/PMMA/carbon                                                                                                  | 260                        | 1.202        | 12.64                           | 0.71   | 10.95 | 7         |      |
| 7   | FTO/c-TiO <sub>2</sub> /m-TiO <sub>2</sub> /Al <sub>2</sub> O <sub>3</sub> /NiO/carbon (embed CsPbI <sub>2</sub> Br)                                     | 100                        | 0.944        | 14.33                           | 0.6250 | 8.44  | 7         |      |
| 8   | ITO/SnO <sub>2</sub> /CsPbI <sub>2</sub> Br/carbon                                                                                                       | 180                        | 1.187        | 12.91                           | 0.661  | 10.13 | 9         |      |
| 9   | FTO/c-TiO <sub>2</sub> /CsPbI <sub>2</sub> Br/carbon                                                                                                     | 280                        | 1.15         | 13.87                           | 0.64   | 10.21 | 10        |      |
| 10  | ITO/SnO <sub>2</sub> /CsPbI <sub>2</sub> Br/carbon                                                                                                       | 150                        | 1.14         | 14.25                           | 0.6412 | 10.44 | 11        |      |
| 11  | ITO/SnO <sub>2</sub> /CsPbI <sub>2</sub> Br/Co <sub>3</sub> O <sub>4</sub> /carbon                                                                       | 260                        | 1.187        | 13.09                           | 0.7212 | 11.21 | 12        |      |
| 12  | ITO/SnO <sub>2</sub> /CsPbI <sub>2</sub> Br/SnPc/carbon                                                                                                  | 120                        | 1.244        | 13.69                           | 0.669  | 11.39 | 1         |      |
| 13  | ITO/SnO <sub>2</sub> /KOH/CsPbI <sub>2</sub> Br/carbon                                                                                                   | 150                        | 1.20         | 14.24                           | 0.6871 | 11.78 | 13        |      |
| 14  | FTO/c-TiO <sub>2</sub> /m-TiO <sub>2</sub> /CsPbI <sub>2</sub> Br/carbon black/carbon                                                                    | 280                        | 1.210        | 14.94                           | 0.7259 | 13.13 | 14        |      |
| 15  | ITO/c-TiO <sub>2</sub> /m-TiO <sub>2</sub> /Al <sub>2</sub> O <sub>3</sub> /NiO/carbon (embed CsPb <sub>0.98</sub> Mg <sub>0.02</sub> I <sub>2</sub> Br) | 280                        | 1.063        | 14.75                           | 0.69   | 10.8  | 15        |      |
| 16  | ITO/SnO <sub>2</sub> /CsPbI <sub>2</sub> Br/CuPc derivative/carbon                                                                                       | 120                        | 1.223        | 13.61                           | 0.663  | 11.04 | 2         |      |
| 17  | FTO/TiO <sub>2</sub> NRAs/CsCl/CsPbI <sub>2</sub> Br/carbon                                                                                              | 260                        | 1.15         | 14.39                           | 0.691  | 11.45 | 16        |      |
| 18  | FTO/c-TiO <sub>2</sub> /m-TiO <sub>2</sub> /CsPb <sub>0.98</sub> La <sub>0.02</sub> I <sub>2</sub> Br/carbon                                             | 260                        | 1.12         | 11.66                           | 0.6124 | 8.03  | 17        |      |
| 19  | FTO/SnO <sub>2</sub> /CsPbI <sub>2</sub> Br (PbI <sub>2</sub> -rich)/carbon                                                                              | 280                        | 1.23         | 15.46                           | 0.64   | 12.19 | 18        |      |
| 20  | FTO/c-TiO <sub>2</sub> /m-TiO <sub>2</sub> /Al <sub>2</sub> O <sub>3</sub> /NiO/carbon (embed CsPb <sub>0.5</sub> Sn <sub>0.5</sub> I <sub>2</sub> Br)   | 80                         | 0.62         | 20.1                            | 0.65   | 8.10  | 19        |      |
| 21  | FTO/c-TiO <sub>2</sub> /CsPbI <sub>2</sub> Br/CuPc/PCCE                                                                                                  | 160                        | 1.22         | 14.33                           | 0.75   | 13.16 | 20        |      |
| 22  | FTO/SnO <sub>2</sub> /CsPbI <sub>2</sub> Br with PANI/carbon                                                                                             | 280                        | 1.33         | 14.29                           | 0.7096 | 13.52 | 21        |      |
| 23  | ITO/SnO <sub>2</sub> /CsPbI <sub>2</sub> Br/BrAL/carbon                                                                                                  | 260                        | 1.205        | 13.68                           | 0.688  | 11.34 | 22        |      |
| 24  | FTO/c-TiO <sub>2</sub> /CsPbI <sub>2</sub> Br (PbI <sub>2</sub> -rich)/carbon                                                                            | 250                        | 1.19         | 14.6                            | 0.736  | 12.78 | 23        |      |
| 25  | FTO/c-TiO <sub>2</sub> /BMIMPF <sub>6</sub> /CsPbI <sub>2</sub> Br/carbon                                                                                | 250                        | 1.22         | 14.33                           | 0.7527 | 13.19 | 24        |      |
| 26  | ITO/SnO <sub>2</sub> /CsPbI <sub>2</sub> Br/PEAI/carbon                                                                                                  | 280                        | 1.3          | 14.508                          | 0.7102 | 13.38 | 25        |      |
| 27  | FTO/c-TiO <sub>2</sub> /CsPbI <sub>2</sub> Br/MABr/carbon                                                                                                | 200                        | 1.207        | 16.62                           | 0.74   | 14.84 | 26        |      |

|    |                                                                                                            |     |       |       |        |       |    |
|----|------------------------------------------------------------------------------------------------------------|-----|-------|-------|--------|-------|----|
| 28 | FTO/c-TiO <sub>2</sub> /CsPbI <sub>2</sub> Br/HTAB/carbon                                                  | 270 | 1.26  | 14.1  | 0.806  | 14.3  | 27 |
| 29 | FTO/c-TiO <sub>2</sub> /m-TiO <sub>2</sub> /CsPbI <sub>2</sub> Br with NaSCN/carbon                        | 270 | 1.267 | 14.31 | 0.8066 | 14.63 | 28 |
| 30 | FTO/c-TiO <sub>2</sub> /CsPbI <sub>2</sub> Br/carbon                                                       | 160 | 1.17  | 14.84 | 0.7382 | 12.82 | 29 |
| 31 | FTO/c-TiO <sub>2</sub> /CsPbI <sub>2</sub> Br/NPTMS/carbon                                                 | 300 | 1.134 | 14.78 | 0.61   | 10.22 | 30 |
| 32 | ITO/SnO <sub>2</sub> /SnCl <sub>2</sub> /CsPbI <sub>2</sub> Br/Cs <sub>2</sub> PtI <sub>6</sub> /carbon    | 160 | 1.28  | 14.85 | 0.72   | 13.69 | 31 |
| 33 | FTO/c-TiO <sub>2</sub> /TiCl <sub>4</sub> -TiCl <sub>3</sub> /CsPbI <sub>2</sub> Br/carbon                 | 270 | 1.28  | 14.21 | 0.794  | 14.46 | 32 |
| 34 | FTO/SnO <sub>2</sub> /SnCl <sub>2</sub> /CsPbI <sub>2</sub> Br/carbon                                      | 160 | 1.22  | 14.83 | 0.72   | 13.01 | 33 |
| 35 | FTO/c-TiO <sub>2</sub> /CsPbI <sub>2</sub> Br with PVP/Spiro-OMeTAD/carbon                                 | 160 | 1.01  | 18.47 | 0.5635 | 10.47 | 34 |
| 36 | FTO/SnO <sub>2</sub> /CsPbI <sub>2</sub> Br/TBAI/carbon                                                    | 280 | 1.23  | 14.34 | 0.70   | 12.29 | 35 |
| 37 | FTO/c-TiO <sub>2</sub> /CsPbI <sub>2</sub> Br with Mg(Ac) <sub>2</sub> /carbon                             | 280 | 1.214 | 14.18 | 0.7590 | 13.08 | 36 |
| 38 | FTO/SnO <sub>2</sub> /CsPbI <sub>2</sub> Br/delta-2:2-bis (1,3-dithiazole)/carbon                          | 160 | 1.26  | 14.74 | 0.74   | 13.78 | 37 |
| 39 | FTO/c-TiO <sub>2</sub> /m-TiO <sub>2</sub> /CsPbI <sub>2</sub> Br/CNTs                                     | 250 | 1.12  | 14.17 | 0.712  | 11.31 | 38 |
| 40 | ITO/SnO <sub>2</sub> /SnCl <sub>2</sub> /CsPbI <sub>2</sub> Br/BMIMBF <sub>4</sub> /carbon                 | 160 | 1.27  | 14.68 | 0.75   | 14.03 | 39 |
| 41 | ITO/SnO <sub>2</sub> /CsPbI <sub>2</sub> Br with MAAC/carbon                                               | 280 | 1.27  | 14.2  | 0.618  | 11.2  | 40 |
| 42 | FTO/Nb <sub>2</sub> O <sub>5</sub> /Cs <sub>0.99</sub> Rb <sub>0.01</sub> PbI <sub>2</sub> Br/carbon       | 150 | 1.23  | 13.8  | 0.66   | 11.2  | 5  |
| 43 | FTO/c-TiO <sub>2</sub> /CsPbI <sub>2</sub> Br/carbon                                                       | 250 | 1.164 | 16.09 | 0.71   | 13.30 | 41 |
| 44 | ITO/c-TiO <sub>2</sub> /CsPbI <sub>2</sub> Br/ATHPBr/carbon                                                | 160 | 1.30  | 14.28 | 0.7811 | 14.50 | 42 |
| 45 | FTO/c-TiO <sub>2</sub> /m-TiO <sub>2</sub> /CsPbI <sub>2</sub> Br with MPA-CdSe QDs/carbon                 | 270 | 1.25  | 14.47 | 0.801  | 14.49 | 43 |
| 46 | FTO/c-TiO <sub>2</sub> /CsPbI <sub>2</sub> Br/MoO <sub>3</sub> &PTAA/carbon                                | 150 | 1.18  | 13.93 | 0.7852 | 12.91 | 44 |
| 47 | FTO/SnO <sub>2</sub> /CsPbI <sub>2</sub> Br with PA/carbon                                                 | 130 | 1.28  | 13.64 | 0.625  | 10.95 | 45 |
| 48 | FTO/c-TiO <sub>2</sub> /m-TiO <sub>2</sub> /CsPbI <sub>2</sub> Br/Cs <sub>2</sub> SnI <sub>6</sub> /carbon | 270 | 1.267 | 14.51 | 0.7981 | 14.67 | 46 |
| 49 | FTO/c-TiO <sub>2</sub> /CsPbI <sub>2</sub> Br/carbon                                                       | 300 | 1.09  | 16.59 | 0.7240 | 13.07 | 47 |
| 50 | FTO/c-TiO <sub>2</sub> /CsPbI <sub>2</sub> Br/carbon                                                       | 250 | 1.312 | 15.70 | 0.74   | 15.24 | 48 |



**Table S8.** Photovoltaic parameters of carbon-based CsPbI<sub>2</sub>Br PSCs measured under the *RS* and *FS* directions.

| Device    | Scan direction | $V_{oc}$ (V) | $J_{sc}$ (mA cm <sup>-2</sup> ) | FF    | PCE (%) | HI    |
|-----------|----------------|--------------|---------------------------------|-------|---------|-------|
| Reference | <i>RS</i>      | 1.217        | 14.69                           | 0.681 | 12.18   | 0.102 |
|           | <i>FS</i>      | 1.208        | 14.46                           | 0.626 | 10.94   |       |
| PEAI      | <i>RS</i>      | 1.244        | 14.81                           | 0.720 | 13.27   | 0.036 |
|           | <i>FS</i>      | 1.222        | 14.60                           | 0.717 | 12.79   |       |
| PEABr     | <i>RS</i>      | 1.254        | 14.84                           | 0.726 | 13.51   | 0.022 |
|           | <i>FS</i>      | 1.247        | 14.68                           | 0.722 | 13.22   |       |
| P-F-PEAI  | <i>RS</i>      | 1.261        | 14.88                           | 0.740 | 13.89   | 0.035 |
|           | <i>FS</i>      | 1.253        | 14.72                           | 0.727 | 13.41   |       |
| P-F-PEABr | <i>RS</i>      | 1.269        | 14.91                           | 0.738 | 13.97   | 0.019 |
|           | <i>FS</i>      | 1.265        | 14.79                           | 0.732 | 13.70   |       |

**Table S9.** Detailed parameters derived from the UPS spectra for reference and passivated CsPbI<sub>2</sub>Br films.

| Sample    | $E_{offset}$ | $E_{onset}$ | $E_g$ | $W_F$ | VBM   | CBM   |
|-----------|--------------|-------------|-------|-------|-------|-------|
| Reference | 16.87        | 1.71        | 1.88  | -4.35 | -6.06 | -4.18 |
| PEAI      | 17.07        | 1.83        | 1.87  | -4.15 | -5.98 | -4.11 |
| PEABr     | 17.13        | 1.85        | 1.89  | -4.09 | -5.94 | -4.05 |
| P-F-PEAI  | 17.20        | 1.86        | 1.87  | -4.02 | -5.88 | -4.01 |
| P-F-PEABr | 17.26        | 1.87        | 1.89  | -3.96 | -5.83 | -3.94 |

**Table S10.** Fitting parameters of TPV of reference and passivated devices.

| Device    | $A_3$ | $\tau_3$<br>(ms) | $\tau_3$<br>(%) | $A_4$ | $\tau_4$<br>(ms) | $\tau_4$<br>(%) | $\tau_{TPV}$<br>(ms) |
|-----------|-------|------------------|-----------------|-------|------------------|-----------------|----------------------|
| Reference | 0.87  | 1.12             | 0.12            | 0.32  | 22.98            | 0.88            | 20.42                |
| PEAI      | 1.17  | 0.89             | 0.13            | 0.37  | 18.45            | 0.87            | 16.13                |
| PEABr     | 1.76  | 0.54             | 0.18            | 0.24  | 17.91            | 0.82            | 14.77                |
| P-F-PEAI  | 0.64  | 1.58             | 0.16            | 0.45  | 12.17            | 0.84            | 10.52                |
| P-F-PEABr | 0.24  | 0.90             | 0.03            | 0.75  | 10.51            | 0.97            | 10.25                |

**Table S11.** Fitting values of different parameters obtained from the Nyquist plots of

reference and passivated devices measured at a bias of 1.20 V under light illumination.

| Device    | $R_s$<br>( $\Omega \cdot \text{cm}^2$ ) | $R_{tra}$<br>( $\Omega \cdot \text{cm}^2$ ) | $R_{rec}$<br>( $\Omega \cdot \text{cm}^2$ ) | $CPE_{tra-T}$<br>(nF $\text{cm}^{-2}$ ) | $CPE_{tra-P}$ | $CPE_{rec-T}$<br>( $\times 10^6$ nF $\text{cm}^{-2}$ ) | $CPE_{rec-P}$ |
|-----------|-----------------------------------------|---------------------------------------------|---------------------------------------------|-----------------------------------------|---------------|--------------------------------------------------------|---------------|
| Reference | 2.59                                    | 163.4                                       | 583.38                                      | 215.9                                   | 0.950         | 1.31                                                   | 0.552         |
| PEAI      | 2.17                                    | 144.0                                       | 605.20                                      | 110.4                                   | 0.998         | 1.76                                                   | 0.607         |
| PEABr     | 2.14                                    | 126.7                                       | 700.56                                      | 211.3                                   | 0.937         | 2.31                                                   | 0.480         |
| P-F-PEAI  | 1.55                                    | 111.0                                       | 1069.11                                     | 312.0                                   | 0.926         | 2.60                                                   | 0.460         |
| P-F-PEABr | 1.04                                    | 92.3                                        | 1089.00                                     | 104.4                                   | 0.999         | 3.05                                                   | 0.517         |

**Table S12.** The  $n$  and  $\alpha$  values of reference and passivated devices extracted from **Figure 5f** and **S14**.

| Device   | Reference | PEAI  | PEABr | P-F-PEAI | P-F-PEABr |
|----------|-----------|-------|-------|----------|-----------|
| $n$      | 1.89      | 1.71  | 1.69  | 1.67     | 1.63      |
| $\alpha$ | 0.975     | 0.981 | 0.983 | 0.984    | 0.986     |

## References

- 1 X. Zhang, N. Gao, Y. Li, L. Xie, X. Yu, X. Lu, X. Gao, J. Gao, L. Shui, S. Wu and J.-M. Liu, *ACS Appl. Energy Mater.*, 2020, **3**, 7832-7843.
- 2 X. Zhang, J. Yang, L. Xie, X. Lu, X. Gao, J. Gao, L. Shui, S. Wu and J.-M. Liu, *Dye. Pigm.*, 2021, **186**, 109024.
- 3 C. Dong, X. Han, Y. Zhao, J. Li, L. Chang and W. Zhao, *Sol. RRL*, 2018, **2**, 1800139.
- 4 Z. Guo, S. Zhao, A. Liu, Y. Kamata, S. Teo, S. Yang, Z. Xu, S. Hayase and T. Ma, *ACS Appl. Mater. Interfaces*, 2019, **11**, 19994-20003.

- 5 Y. Guo, F. Zhao, J. Tao, J. Jiang, J. Zhang, J. Yang, Z. Hu and J. Chu, *ChemSusChem*, 2019, **12**, 983-989.
- 6 G. Wang, J. Liu, K. Chen, R. Pathak, A. Gurung and Q. Qiao, *J. Colloid Interf. Sci.*, 2019, **555**, 180-186.
- 7 X. Zhang, Y. Zhou, Y. Li, J. Sun, X. Lu, X. Gao, J. Gao, L. Shui, S. Wu and J.-M. Liu, *J. Mater. Chem. C*, 2019, **7**, 3852-3861.
- 8 T. Zhang, H. Li, S. Liu, X. Wang, X. Gong, Q. Sun, Y. Shen and M. Wang, *J Phys. Chem. Lett.*, 2019, **10**, 200-205.
- 9 X. Meng, Z. Wang, W. Qian, Z. Zhu, T. Zhang, Y. Bai, C. Hu, S. Xiao, Y. Yang and S. Yang, *J. Phys. Chem. Lett.*, 2019, **10**, 194-199.
- 10 C. Dong, X. Han, W. Li, Q. Qiu and J. Wang, *Nano Energy*, 2019, **59**, 553-559.
- 11 Z. Ye, J. Zhou, J. Hou, F. Deng, Y.-Z. Zheng and X. Tao, *Sol. RRL*, 2019, **3**, 1900109.
- 12 Y. Zhou, X. Zhang, X. Lu, X. Gao, J. Gao, L. Shui, S. Wu and J.-M. Liu, *Sol. RRL*, 2019, **3**, 1800315.
- 13 F. Deng, X. Li, X. Lv, J. Zhou, Y. Chen, X. Sun, Y.-Z. Zheng, X. Tao and J.-F. Chen, *ACS Appl. Energy Mater.*, 2020, **3**, 401-410.
- 14 S. Gong, H. Li, Z. Chen, C. Shou, M. Huang and S. Yang, *ACS Appl. Mater. Interfaces*, 2020, **12**, 34882-34889.
- 15 S. Liu, L. Guan, T. Zhang, X. Gong, X. Zhao, Q. Sun, X. Shai, X. L. Zhang, X. Xiao, Y. Shen and M. Wang, *Appl. Mater. Today*, 2020, **20**, 100644.
- 16 W. Cai, Y. Lv, K. Chen, Z. Zhang, Y. Jin and X. Zhou, *Energy Fuels*, 2020, **34**, 11670-11678.
- 17 S. Chen, T. Zhang, X. Liu, J. Qiao, L. Peng, J. Wang, Y. Liu, T. Yang and J. Lin, *J. Mater. Chem. C*, 2020, **8**, 3351-3358.
- 18 C. Liu, M. Wu, Y. Wu, D. Wang and T. Zhang, *J. Power Sources*, 2020, **447**, 227389.
- 19 H. Ban, Q. Sun, T. Zhang, H. Li, Y. Shen and M. Wang, *Sol. RRL*, 2020, **4**, 1900457.
- 20 P. Xie, G. Zhang, Z. Yang, Z. Pan, Y. Fang, H. Rao and X. Zhong, *Sol. RRL*, 2020,

- 4, 2000431.
- 21 C. Liu, J. He, M. Wu, Y. Wu, P. Du, L. Fan, Q. Zhang, D. Wang and T. Zhang, *Sol. RRL*, 2020, **4**, 2000016.
- 22 Y. Li, J. Yang, L. Xie, Y. Li, X. Liang, X. Lu, X. Gao, J. Gao, L. Shui, S. Wu and J.-M. Liu, *ACS Appl. Energy Mater.*, 2021, **4**, 5415-5423.
- 23 K. Wang, T. You, R. Yin, B. Fan, J. Liu, S. Cui, H. Chen and P. Yin, *ACS Appl. Energy Mater.*, 2021, **4**, 3508-3517.
- 24 R. Yin, K.-X. Wang, S. Cui, B.-B. Fan, J.-W. Liu, Y.-K. Gao, T.-T. You and P.-G. Yin, *ACS Appl. Energy Mater.*, 2021, **4**, 9294-9303.
- 25 Y. Wu, Q. Zhang, L. Fan, C. Liu, M. Wu, D. Wang and T. Zhang, *ACS Appl. Energy Mater.*, 2021, **4**, 5583-5589.
- 26 W. Zhu, W. Chai, D. Chen, J. Ma, D. Chen, H. Xi, J. Zhang, C. Zhang and Y. Hao, *ACS Energy Lett.*, 2021, **6**, 1500-1510.
- 27 G. Zhang, P. Xie, Z. Huang, Z. Yang, Z. Pan, Y. Fang, H. Rao and X. Zhong, *Adv. Funct. Mater.*, 2021, **31**, 2011187.
- 28 Z. Yang, G. Zhang, J. Zhang, Z. Pan, S. Yang, B. Liu, H. Rao and X. Zhong, *Chem. Eng. J.*, 2022, **430**, 133083.
- 29 W. Su, X. Han, J. Feng, Z. Zhu, H. Huang, J. Li, T. Yu, Z. Li and Z. Zou, *Energy Fuels*, 2021, **35**, 11488-11495.
- 30 J. Yu, W. Li, K. Zhang and X. Han, *J. Mater. Sci.: Mater. Electron.*, 2021, **32**, 20936-20945.
- 31 Q. Han, S. Yang, L. Wang, F. Yu, X. Cai and T. Ma, *J. Colloid Interf. Sci.*, 2022, **606**, 800-807.
- 32 W. Wang, Y. Lin, G. Zhang, C. Kang, Z. Pan, X. Zhong and H. Rao, *J. Energy Chem.*, 2021, **63**, 442-451.
- 33 Q. Han, F. Yu, L. Wang, S. Yang, X. Cai, X. Meng, O. Yūta, K. Takeshi, C. Zhang and T. Ma, *J. Power Sources*, 2021, **516**, 230676.
- 34 S. Ullah, P. Yang, J. Wang, L. Liu, S.-E. Yang, T. Xia and Y. Chen, *J. Solid State Chem.*, 2022, **305**, 122656.
- 35 S. Zheng, H. Wang, P. Wei, H. Chen and Y. Xie, *Sol. Energy*, 2021, **230**, 666-674.

- 36 K. Zhang, W. Li, J. Yu and X. Han, *Sol. Energy*, 2021, **222**, 186-192.
- 37 Q. Han, S. Yang, L. Wang, F. Yu, C. Zhang, M. Wu and T. Ma, *Sol. Energy*, 2021, **216**, 351-357.
- 38 Z. Dong, W. Li, H. Wang, X. Jiang, H. Liu, L. Zhu and H. Chen, *Sol. RRL*, 2021, **5**, 2100370.
- 39 F. Yu, Q. Han, L. Wang, S. Yang, X. Cai, C. Zhang and T. Ma, *Sol. RRL*, 2021, **5**, 2100404.
- 40 X. Li, Y. Zhang, G. Liu, Z. Zhang, L. Xiao, Z. Chen and B. Qu, *ACS Appl. Energy Mater.*, 2021, **4**, 13444-13449.
- 41 Z. Zhang, Y. Ba, D. Chen, J. Ma, W. Zhu, H. Xi, D. Chen, J. Zhang, C. Zhang and Y. Hao, *iScience*, 2021, **24**, 103365.
- 42 Z. Yan, D. Wang, Y. Jing, X. Wang, H. Zhang, X. Liu, S. Wang, C. Wang, W. Sun, J. Wu and Z. Lan, *Chem. Eng. J.*, 2022, **433**, 134611.
- 43 S. Xu, C. Kang, Z. Huang, Z. Zhang, H. Rao, Z. Pan and X. Zhong, *Sol. RRL*, 2022, **6**, 2100989.
- 44 D. S. Lee, M. J. Ki, H. J. Lee, J. K. Park, S. Y. Hong, B. W. Kim, J. H. Heo and S. H. Im, *ACS Appl. Mater. Interfaces*, 2022, **14**, 7926-7935.
- 45 X. Xu, W. Qin, S. Liu, C. Xing, G. Ge, D. Wang and T. Zhang, *Org. Electron.*, 2022, **103**, 106463.
- 46 G. Zhang, J. Zhang, Y. Liao, Z. Pan, H. Rao and X. Zhong, *Chem. Eng. J.*, 2022, **440**, 135710.
- 47 J. Lv, W. Zhao, W. Li, J. Yu, M. Zhang, X. Han and T. Tanaka, *J. Mater. Chem. C*, 2022, **10**, 4276-4285.
- 48 W. Zhu, J. Ma, W. Chai, T. Han, D. Chen, X. Xie, G. Liu, P. Dong, H. Xi, D. Chen, J. Zhang, C. Zhang and Y. Hao, *Sol. RRL*, 2022, **6**, 2200020.
